# Supplementary material
Source: MDPI journal article supplement (https://www.mdpi.com/2313-433X/7/8/146)
Supplement: s1 [file s1]

## Supplemental material

Table S1: imgaug parameters for conventional augmentation

| Parameter                                                  | weak   | weak-medium | medium | medium-strong | strong |
|------------------------------------------------------------|--------|-------------|--------|---------------|--------|
| <b>Rotation (Rotate())<sup>1</sup></b>                     |        |             |        |               |        |
| rotate=                                                    | ±5     | ±10         | ±20    | ±30           | ±45    |
| <b>Snowy landscape (FastSnowyLandscape())</b>              |        |             |        |               |        |
| lightness_threshold=                                       | 220.0  | 200.0       | 180.0  | 160.0         | 140.0  |
| lightness_multiplier=                                      | 1.6    | 2.2         | 2.8    | 3.4           | 4.0    |
| <b>Snowflakes (imgcorruptlike.Snow())</b>                  |        |             |        |               |        |
| severity=                                                  | 1      | 2           | 3      | 4             | 5      |
| <b>Rain (Rain())</b>                                       |        |             |        |               |        |
| nb_iterations=                                             | 1      | 1           | 2      | 2             | 3      |
| drop_size=                                                 | 0.05   | 0.15        | 0.15   | 0.175         | 0.20   |
| speed=                                                     | 0.25   | 0.20        | 0.20   | 0.20          | 0.20   |
| <b>Fog (CloudLayer())<sup>2</sup></b>                      |        |             |        |               |        |
| density_multiplier=                                        | 0.30   | 0.40        | 0.50   | 0.65          | 0.90   |
| <b>Gaussian Blur (GaussianBlur())</b>                      |        |             |        |               |        |
| sigma=                                                     | 0.7    | 1.0         | 2.0    | 3.0           | 4.0    |
| <b>Hue and saturation change (AddToHueAndSaturation())</b> |        |             |        |               |        |
| value_hue=                                                 | ±5     | ±16         | ±26    | ±68           | ±125   |
| value_saturation=                                          | 0      | 0           | 0      | 0             | 32     |
| <b>Exposure (Add(), Multiply())<sup>3</sup></b>            |        |             |        |               |        |
| (low) value=                                               | -10.00 | -20.00      | -30.00 | -40.00        | -50.00 |
| (low) mul=                                                 | 0.90   | 0.80        | 0.70   | 0.60          | 0.50   |
| (high) value=                                              | 10.00  | 20.00       | 30.00  | 40.00         | 50.00  |
| (high) mul=                                                | 1.11   | 1.25        | 1.43   | 1.67          | 2.00   |

<sup>1</sup> Additional parameters for rotation, used across all strengths: mode=['symmetric', 'reflect']

<sup>2</sup> Additional parameters for fog, used across all strengths: intensity\_mean=240, intensity\_freq\_exponent=-1.75, intensity\_coarse\_scale=2, alpha\_min=0.8, alpha\_multiplier=0.3, alpha\_size\_px\_max = 5, alpha\_freq\_exp=-3, sparsity=0.9

<sup>3</sup> Exposure was either underexposed (low values) or overexposed (high values) implemented with OneOf(). In both cases, Add() and Multiply() were executed sequentially (in this order) with Sequential()

Table S2: per class accuracies for testing on real data

| augmentation strength | type         | class accuracy |          |            |          |             |             |
|-----------------------|--------------|----------------|----------|------------|----------|-------------|-------------|
|                       |              | unknown        | sky      | vegetation | rails    | lightsignal | shapesignal |
| <b>strong</b>         | conv. + sem. | 0.901859       | 0.866715 | 0.674393   | 0.479915 | 0.60813     | 0.323817    |
|                       | conventional | 0.903566       | 0.881005 | 0.651493   | 0.409718 | 0.549407    | 0.382491    |
|                       | semantic     | 0.902589       | 0.855426 | 0.635115   | 0.44615  | 0.600423    | 0.291315    |
| <b>medium-strong</b>  | conventional | 0.906037       | 0.821085 | 0.630904   | 0.363306 | 0.56132     | 0.383765    |
|                       | semantic     | 0.896076       | 0.849188 | 0.628569   | 0.405077 | 0.615413    | 0.312844    |
| <b>medium</b>         | conventional | 0.895903       | 0.711767 | 0.654485   | 0.328711 | 0.58099     | 0.378816    |
|                       | semantic     | 0.895505       | 0.810142 | 0.643271   | 0.376876 | 0.591004    | 0.325623    |
| <b>weak-medium</b>    | conventional | 0.87697        | 0.722992 | 0.681023   | 0.32664  | 0.559138    | 0.370551    |
|                       | semantic     | 0.893888       | 0.736366 | 0.639194   | 0.383381 | 0.552729    | 0.346852    |
| <b>weak</b>           | conventional | 0.887158       | 0.821949 | 0.650313   | 0.310993 | 0.526335    | 0.373803    |
|                       | semantic     | 0.895476       | 0.742872 | 0.65687    | 0.341115 | 0.522407    | 0.309018    |

Table S3: per class accuracies for testing on synthetic data

| augmentation strength | type         | class accuracy |          |            |          |             |             |
|-----------------------|--------------|----------------|----------|------------|----------|-------------|-------------|
|                       |              | unknown        | sky      | vegetation | rails    | lightsignal | shapesignal |
| <b>strong</b>         | conv. + sem. | 0.959204       | 0.975528 | 0.94564    | 0.863383 | 0.205275    | 0.24444     |
|                       | conventional | 0.96062        | 0.98308  | 0.950137   | 0.843578 | 0.298865    | 0.276999    |
|                       | semantic     | 0.956622       | 0.97619  | 0.931133   | 0.877281 | 0.175111    | 0.249588    |
| <b>medium-strong</b>  | conventional | 0.963019       | 0.980189 | 0.951953   | 0.843028 | 0.305432    | 0.278935    |
|                       | semantic     | 0.958989       | 0.981044 | 0.938015   | 0.866319 | 0.245828    | 0.281934    |
| <b>medium</b>         | conventional | 0.962327       | 0.980234 | 0.957216   | 0.834508 | 0.351321    | 0.306494    |
|                       | semantic     | 0.961221       | 0.981339 | 0.940074   | 0.842526 | 0.304305    | 0.31435     |
| <b>weak-medium</b>    | conventional | 0.961438       | 0.979488 | 0.958355   | 0.820607 | 0.349085    | 0.314363    |
|                       | semantic     | 0.961527       | 0.97854  | 0.951733   | 0.835526 | 0.344684    | 0.301356    |
| <b>weak</b>           | conventional | 0.962511       | 0.960248 | 0.945188   | 0.819543 | 0.375075    | 0.300725    |
|                       | semantic     | 0.958129       | 0.978256 | 0.958477   | 0.827652 | 0.304782    | 0.291868    |
